# Supplementary material
Source: publisher figshare collection journal article supplement (https://frontiersin.figshare.com/ndownloader/files/16934321)
Supplement: Supplementary file [file 16934321]

# Supplementary Material

## 1 SUPPLEMENTARY MATERIAL

## 2 INTRODUCTION TO EXAMPLES

Supplementary material relating to this article is provided in the form of R and python source code and data that can be used to re-create the examples discussed in the text, as well as interactive versions of the outputs of those examples. The source material is available from Github.com and the live version is available here.

The article discusses two examples:

- Construction of a choropleth or thematic map.
- Estimation of catchment basins and case loadings for rehabilitation centres.

The package available for download (above) includes several implementations of these examples, as follows:

- *R* implementations of both that do not require installation of API keys: Choropleth, Catchment basins.
- *Python* implementations of both that do not require installation of API keys. Choropleth, Catchment basins.
- An alternative *R* implementation of the second example that utilises API keys to access Google services and Mapbox visualization services: Catchment basins with API keys.

The live versions of the examples requiring API keys do not include interactive visualizations. Examples must be recreated by the user, with their own keys, in order to use the visualization tools.

## 3 SOFTWARE SETUP

### 3.1 *R* setup

The R statistical environment can be obtained for Windows, Macintosh and Linux from [www.r-project.org](http://www.r-project.org).

*Rstudio*, a modern graphical development environment for *R*, is also recommended and may be obtained from [www.rstudio.com](http://www.rstudio.com). The following instructions assume an installation of *Rstudio*.

The examples employ a number of *packages* to provide required functionality. These may be installed from inside *R* or *Rstudio* by issuing the following commands:

```
install.packages(c("tidyverse", "sf", "here", "units", "tmaptools",  
                  "tmap", "knitr", "mapdeck", "googleway",  
                  "mapview", "devtools", "dodgr", "viridisLite"))  
  
devtools::install_github("HughParsonage/PSMA")
```

The interactive examples can then be created locally by opening the *R markdown* files, that have a *.Rmd* suffix, and click on the *knit* button in *Rstudio*.

### 3.2 Python setup

The miniconda tools are recommended for management of python installations. The commands below should be executed in the terminal (Mac/Linux) or the command prompt (Windows). The steps are:

1. Install miniconda

2. Change directory to the python folder:

```
cd GeospatialStroke/Python
```

3. Create virtual environment:

```
conda config --prepend channels conda-forge
```

```
conda create -n GEO --strict-channel-priority --yes python=3 --file requirements.txt
```

This command needs to be executed from within the python folder containing the *requirements.txt* file.

4. Activate virtual environment and install notebook kernel:

```
conda activate GEO
```

```
python -m ipykernel install --user --name GEO --display-name "Python (GEO)"
```

5. Change directories in the terminal or command prompt to the location of the notebook folder and launch Jupyter to run the notebooks:

```
jupyter lab
```

A *Jupyter notebook* server will run in your browser - select either *example1.pynb* or *example2.pynb* to open the examples.

In future sessions on the following commands are needed to start the notebook:

```
conda activate GEO
```

```
jupyter lab
```

### 3.3 API Keys and tokens

Online services which offer an interface to their applications will sometimes require use of an API key, or application programming interface key. This key should be unique for each user, developer or application making use of the service as it is a way for the provider to monitor and, where applicable, charge for use.

Two major mapping platforms that require an API key are Google Maps and Mapbox, both of which are used in the second version of the catchment basin example. At the time of writing both allow unrestricted use of the mapping API. However, Google has limits on the other services it offers such as geocoding and direction services.

Both Google and Mapbox require users create an account.

The required Google API keys may be obtained by following instructions provided by Google.

The required Mapbox token may be obtained by following instructions provided by Mapbox.

## 4 SUPPLEMENTARY TABLES

```

Simple feature collection with 1 feature and 7 fields
geometry type: POINT
dimension: XY
bbox: xmin: 145.1207 ymin: -37.92093 xmax: 145.1207 ymax: -37.92093
epsg (SRID): 4326
proj4string: +proj=longlat +datum=WGS84 +no_defs
              query      lat      lon      lat_min      lat_max
1 Monash Medical Centre, Clayton, Victoria, Australia -37.92093 145.1207 -37.92098 -37.92088
  lon_min lon_max      geometry
1 145.1207 145.1208 POINT (145.1207 -37.92093)

```

**Table S1.** Geocoding results for emergency hospital (Monash Medical Center).

```

Simple feature collection with 6 features and 4 fields
geometry type: MULTIPOLYGON
dimension: XY
bbox: xmin: 144.9055 ymin: -37.85553 xmax: 144.9914 ymax: -37.79821
epsg (SRID): 4326
proj4string: +proj=longlat +datum=WGS84 +no_defs
# A tibble: 6 x 5
  POA_NAME Tot_P_P stroke_count_est... DistanceToMMC      geometry
  <chr>      <int>      <dbl>      [km]      <MULTIPOLYGON []>
1 3000      37975      24.7      15.77496 (((144.9576 -37.79972, 144.9588 -37
2 3002      4964      16.8      15.87279 (((144.9732 -37.80792, 144.9826 -37
3 3003      5515       5.14      18.86105 (((144.9165 -37.79821, 144.9257 -37
4 3004      9307      28.1      14.13294 (((144.985 -37.84569, 144.9842 -37
5 3005       525      0.578      18.11235 (((144.9479 -37.82339, 144.948 -37.
6 3006     18808      20.5      16.57805 (((144.956 -37.82305, 144.9579 -37.

```

**Table S2.** Subset of simple features (sf) table containing both demographic and postcode boundary information for postcodes within 20km of the emergency service center. Columns displayed are postcode name, total population, estimate number of stroke cases, distance to emergency center and the postcode geometry. The estimate of stroke cases was based on a combination of population age bands (not illustrated) and incidence data from the NEMESIS study. The distance column was computed between the geometry column of this table and the geometry column of the geocoded hospital location using the *sf::st\_distance* function.

```

Simple feature collection with 3 features and 7 fields
geometry type: POINT
dimension: XY
bbox: xmin: 145.0797 ymin: -38.04446 xmax: 145.3457 ymax: -37.95604
epsg (SRID): 4283
proj4string: +proj=longlat +ellps=GRS80 +towgs84=0,0,0,0,0,0,0 +no_defs
              query      lat      lon      lat_min      lat_max
DandenongHospital Dandenong Hospital, Dandenong VIC 3175, Australia -37.97611 145.2178 -37.97728 -37.97545
CaseyHospital      62-70 Kangan Dr, Berwick VIC 3806, Australia -38.04446 145.3457 -38.04539 -38.04446
KingstonHospital   The Kingston Centre, Heatherton VIC 3202, Australia -37.95604 145.0797 -37.95830 -37.95344
              lon_min lon_max      geometry
DandenongHospital 145.2162 145.2198 POINT (145.2178 -37.97611)
CaseyHospital      145.3456 145.3457 POINT (145.3457 -38.04446)
KingstonHospital   145.0768 145.0810 POINT (145.0797 -37.95604)

```

**Table S3.** Geocoded locations for the 3 rehabilitation centers.

```

Simple feature collection with 6 features and 13 fields
Attribute-geometry relationship: 13 constant, 0 aggregate, 0 identity
geometry type: POINT
dimension: XY
bbox: xmin: 145.0398 ymin: -37.89162 xmax: 145.0865 ymax: -37.86661
epsg (SRID): 4283
proj4string: +proj=longlat +ellps=GRS80 +towgs84=0,0,0,0,0,0,0 +no_defs
  POSTCODE ADDRESS_DETAIL_INTRNL_ID STREET_LOCALITY_INTRNL_ID BUILDING_NAME LOT_NUMBER FLAT_NUMBER
1 3145 11867025 590471 <NA> <NA> 126
2 3145 10017734 530005 <NA> <NA> 10
3 3145 10204296 526751 <NA> <NA> NA
4 3145 11223826 528755 <NA> <NA> NA
5 3145 9964136 473522 <NA> <NA> 5
6 3145 9950516 421545 <NA> <NA> NA
  NUMBER_FIRST STREET_NAME STREET_TYPE_CODE lat_int lat_rem lon_int lon_rem      geometry
1 1341 DANDENONG ROAD -37 -8876953 145 805995 POINT (145.0806 -37.8877)
2 13 LLOYDS AVENUE -37 -8857273 145 445100 POINT (145.0445 -37.88573)
3 94 TOORONGA ROAD -37 -8666070 145 398309 POINT (145.0398 -37.86661)
4 368 WAVERLEY ROAD -37 -8775029 145 594729 POINT (145.0595 -37.8775)
5 18 CAPON STREET -37 -8872378 145 865195 POINT (145.0865 -37.88724)
6 6 CARRUM STREET -37 -8916150 145 863720 POINT (145.0864 -37.89162)

```

**Table S4.** Randomly sampled addresses from the PSMA data base.
